# Supplementary material for: H3PW12O40/mpg-C3N4 as an efficient and reusable bifunctional catalyst in one-pot oxidation–Knoevenagel condensation tandem reaction
Source: Royal Society of Chemistry journal article supplement (doi:10.1039/c6cy01669c), 2016-12-01
Supplement: c6cy01669c1.pdf [file c6cy01669c1.pdf]

## Electronic Supplementary Information

### **H<sub>3</sub>PW<sub>12</sub>O<sub>40</sub>/mpg-C<sub>3</sub>N<sub>4</sub> as efficient and reusable bifunctional catalyst in one-pot oxidation-Knoevenagel condensation tandem reaction**

Hefang Wang, Cunyue Wang, Yongfang Yang\*, Meng Zhao, Yanji Wang\*

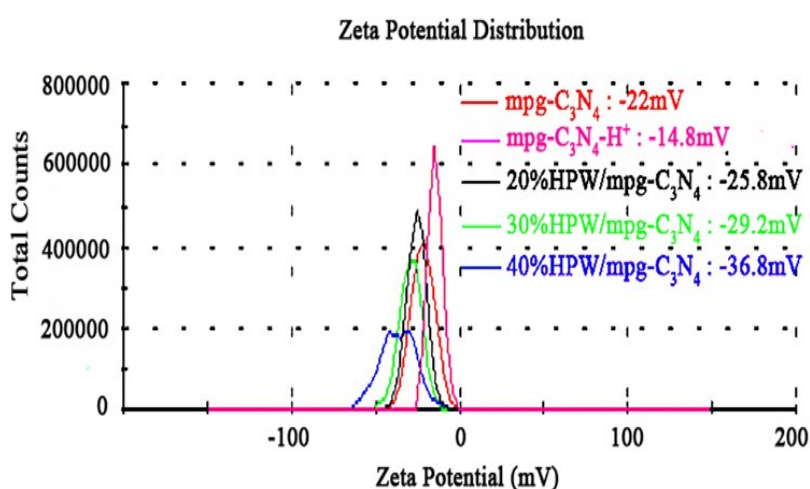

Fig. S1 Zeta potential distribution.

NH<sub>3</sub>-TPD was performed to investigate the acid amounts of HPW, 20%HPW/mpg-C<sub>3</sub>N<sub>4</sub> and 30%HPW/mpg-C<sub>3</sub>N<sub>4</sub>. As shown in Fig. S2, the NH<sub>3</sub>-TPD spectra show two desorption peaks, which are the low temperature desorption peak around 120 °C and the high temperature desorption peak around 525 °C, respectively. It indicates that the existence of weak and strong acidic sites on HPW, 20%HPW/mpg-C<sub>3</sub>N<sub>4</sub> and 30%HPW/mpg-C<sub>3</sub>N<sub>4</sub>.<sup>1,2</sup> The quantitative results are summarized in Table S1. The total acid amount of HPW determined by NH<sub>3</sub>-TPD is 2.11 mmol·g<sup>-1</sup>. Compared with that of 20%HPW/mpg-C<sub>3</sub>N<sub>4</sub> (0.385 mmol·g<sup>-1</sup>), the acid amount of 30%HPW/mpg-C<sub>3</sub>N<sub>4</sub> (0.467 mmol·g<sup>-1</sup>) increases with the increase of HPW loading. The similar results were also obtained in HPW supported on acid-activated palygorskite.<sup>3</sup>

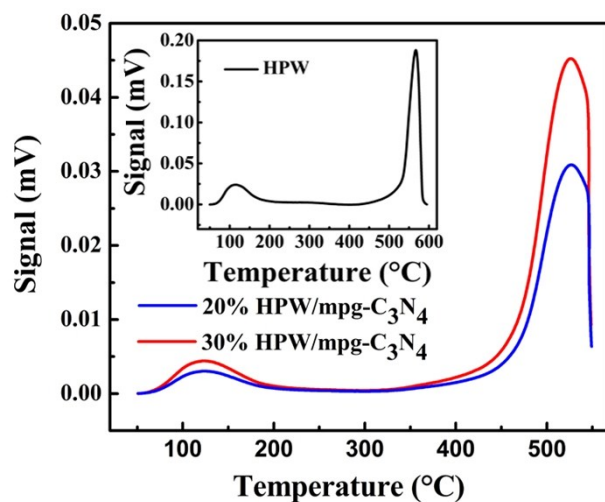

**Fig. S2** NH<sub>3</sub>-TPD spectra of HPW, 20%HPW/mpg-C<sub>3</sub>N<sub>4</sub> and 30%HPW/mpg-C<sub>3</sub>N<sub>4</sub>.

**Table S1** Acid amounts of HPW, 20%HPW/mpg-C<sub>3</sub>N<sub>4</sub> and 30%HPW/mpg-C<sub>3</sub>N<sub>4</sub> determined by NH<sub>3</sub>-TPD

| Sample                                   | Acid amount (mmol·g <sup>-1</sup> ) |                   |               |
|------------------------------------------|-------------------------------------|-------------------|---------------|
|                                          | Weak acid sites                     | Strong acid sites | Total acidity |
| HPW                                      | 0.402                               | 1.71              | 2.11          |
| 20%HPW/mpg-C <sub>3</sub> N <sub>4</sub> | 0.168                               | 0.217             | 0.385         |
| 30%HPW/mpg-C <sub>3</sub> N <sub>4</sub> | 0.194                               | 0.273             | 0.467         |

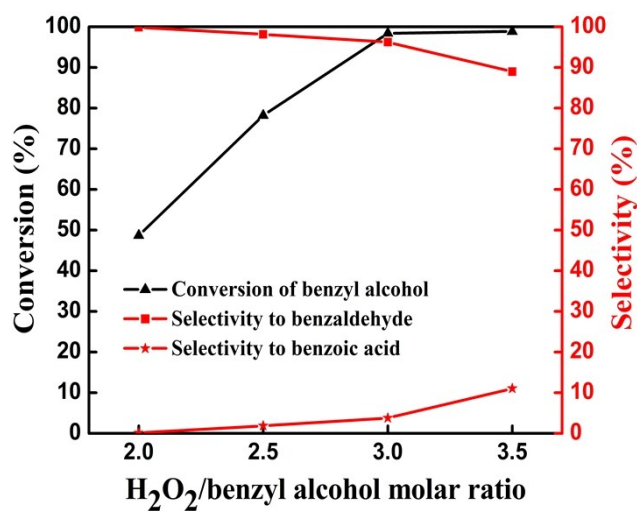

**Fig. S3** The effects of H<sub>2</sub>O<sub>2</sub> amount on the oxidation of benzyl alcohol over 30%HPW/mpg-C<sub>3</sub>N<sub>4</sub>.

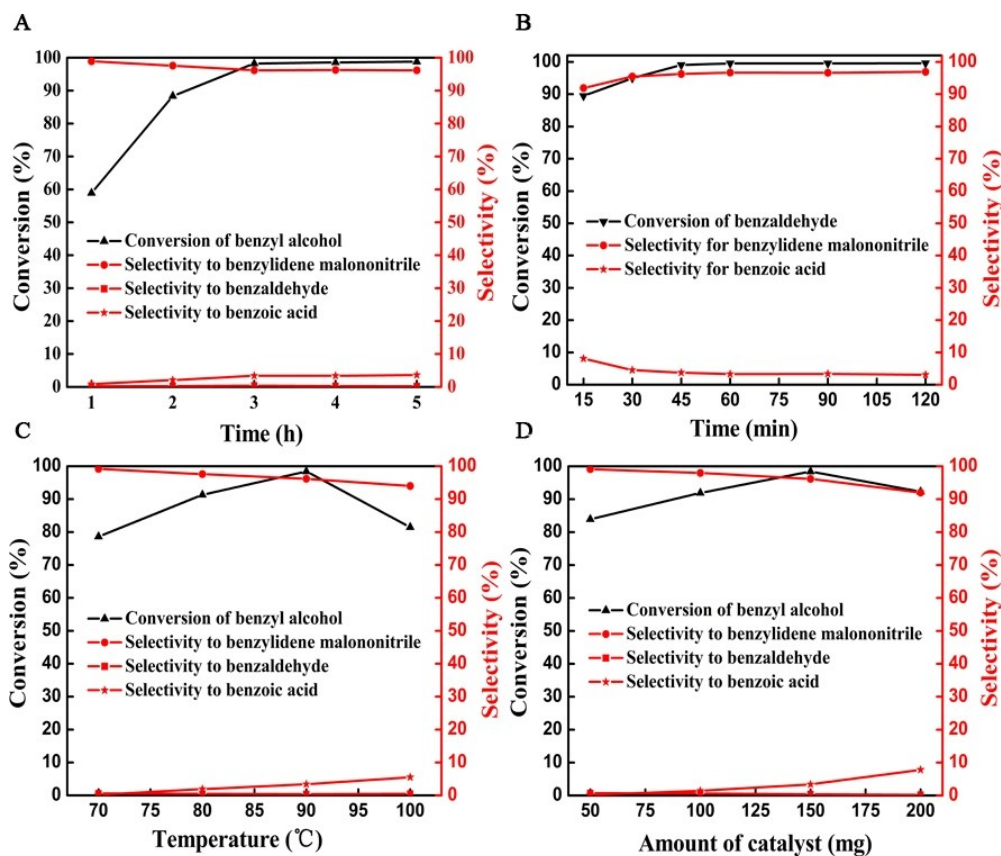

**Fig. S4** The effects of oxidation time (A), Knoevenagel condensation time (B), reaction temperature (C) and catalyst amount (D) on the tandem reaction over 30%HPW/mpg-C<sub>3</sub>N<sub>4</sub>.

A possible mechanism for oxidation-Knoevenagel tandem reaction of **A**<sub>1</sub> and malononitrile over 30%HPW/mpg-C<sub>3</sub>N<sub>4</sub> is proposed in Scheme 2. For the **A**<sub>1</sub> oxidation, H<sub>2</sub>O<sub>2</sub> reacts with HPW to generate active peroxo intermediate, which is responsible for the **A**<sub>1</sub> oxidation to **B**<sub>1</sub> with loss of H<sub>2</sub>O molecule.<sup>4,5</sup> Then the carbonyl group of **B**<sub>1</sub> is activated by HPW (acidic sites) on the surface of 30%HPW/mpg-C<sub>3</sub>N<sub>4</sub> to generate a carbocation. The Lewis-base site of mpg-C<sub>3</sub>N<sub>4</sub> abstracts a proton from the methylene carbon of malononitrile to generate the nucleophilic species,<sup>6</sup> which attacks the carbonyl group of **B**<sub>1</sub> with C-C bond formation followed by dehydration to form the product **C**<sub>1</sub>.<sup>7-9</sup>

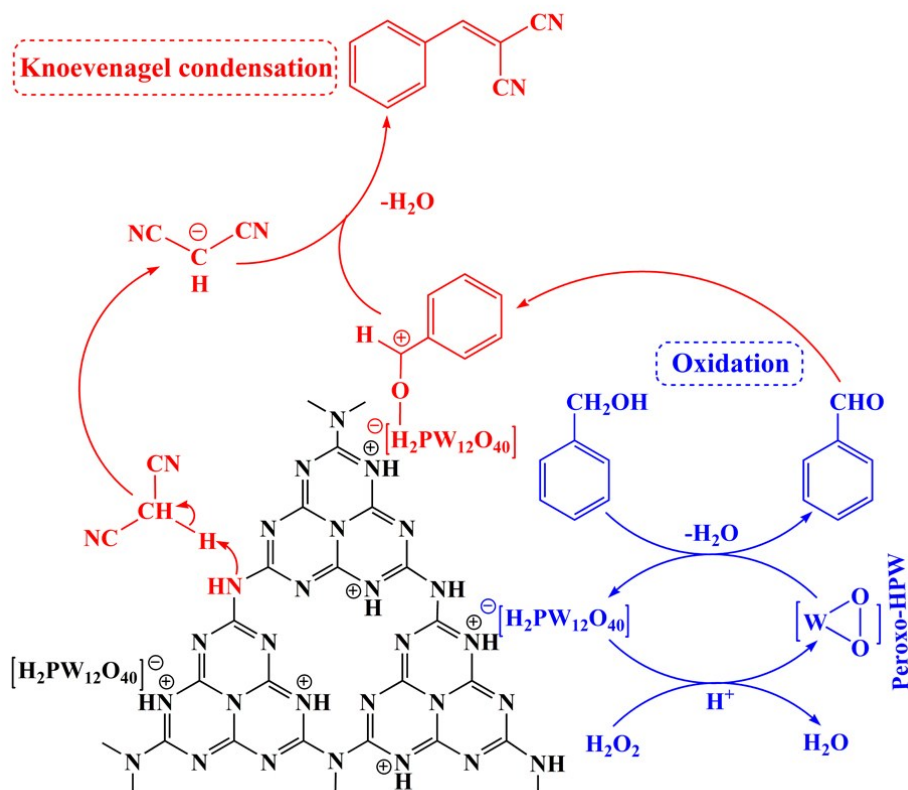

Fig. S5 Proposed mechanism for oxidation-Knoevenagel tandem reaction of **A**<sub>1</sub> and malononitrile over 30%HPW/mpg-C<sub>3</sub>N<sub>4</sub>.

## References

- 1 A. Jha, A. C. Garade, S. P. Mirajkar and C. V. Rode, *Ind. Eng. Chem. Res.*, 2012, **51**, 3916-3922.
- 2 R. Liu, X. Xia, X. Niu, G. Zhang, Y. Lu, R. Jiang and S. He, *Appl. Clay Sci.*, 2015, **105-106**, 71-77.
- 3 R. Liu, X. Niu, X. Xia, Z. Zeng, G. Zhang and Y. Lu, *Rsc Adv.*, 2015, **5**, 62394-62401.
- 4 X. Z. Li, R. Cao and Q. Lin, *Catal. Commun.*, 2015, **69**, 5-10.
- 5 M. P. Chaudhari and S. B. Sawant, *Chem. Eng. J.*, 2005, **106**, 111-118.
- 6 M. B. Ansari, H. Jin, M. N. Parvin and S. E. Park, *Catal. Today*, 2012, **185**, 211-216.
- 7 G. B. B. Varadwaj, S. Rana and K. M. Parida, *Dalton Trans.*, 2013, **42**, 5122-5129.
- 8 M. J. Zhang, P. P. Zhao, Y. Leng, G. J. Chen, J. Wang and J. Huang, *Chem. Eur. J.*, 2012, **18**, 12773-12782.
- 9 A. Karmakar, G. M. D. M. Rubio, M. F. G. Silva, S. Hazra and A. J. L. Pombeiro, *Cryst. Growth Des.*, 2015, **15**, 4185-4197.
